# Supplementary material for: Potential contribution of the uterine microbiome in the development of endometrial cancer
Source: Springer Nature journal article supplement (doi:10.1186/s13073-016-0368-y), 2016-11-15

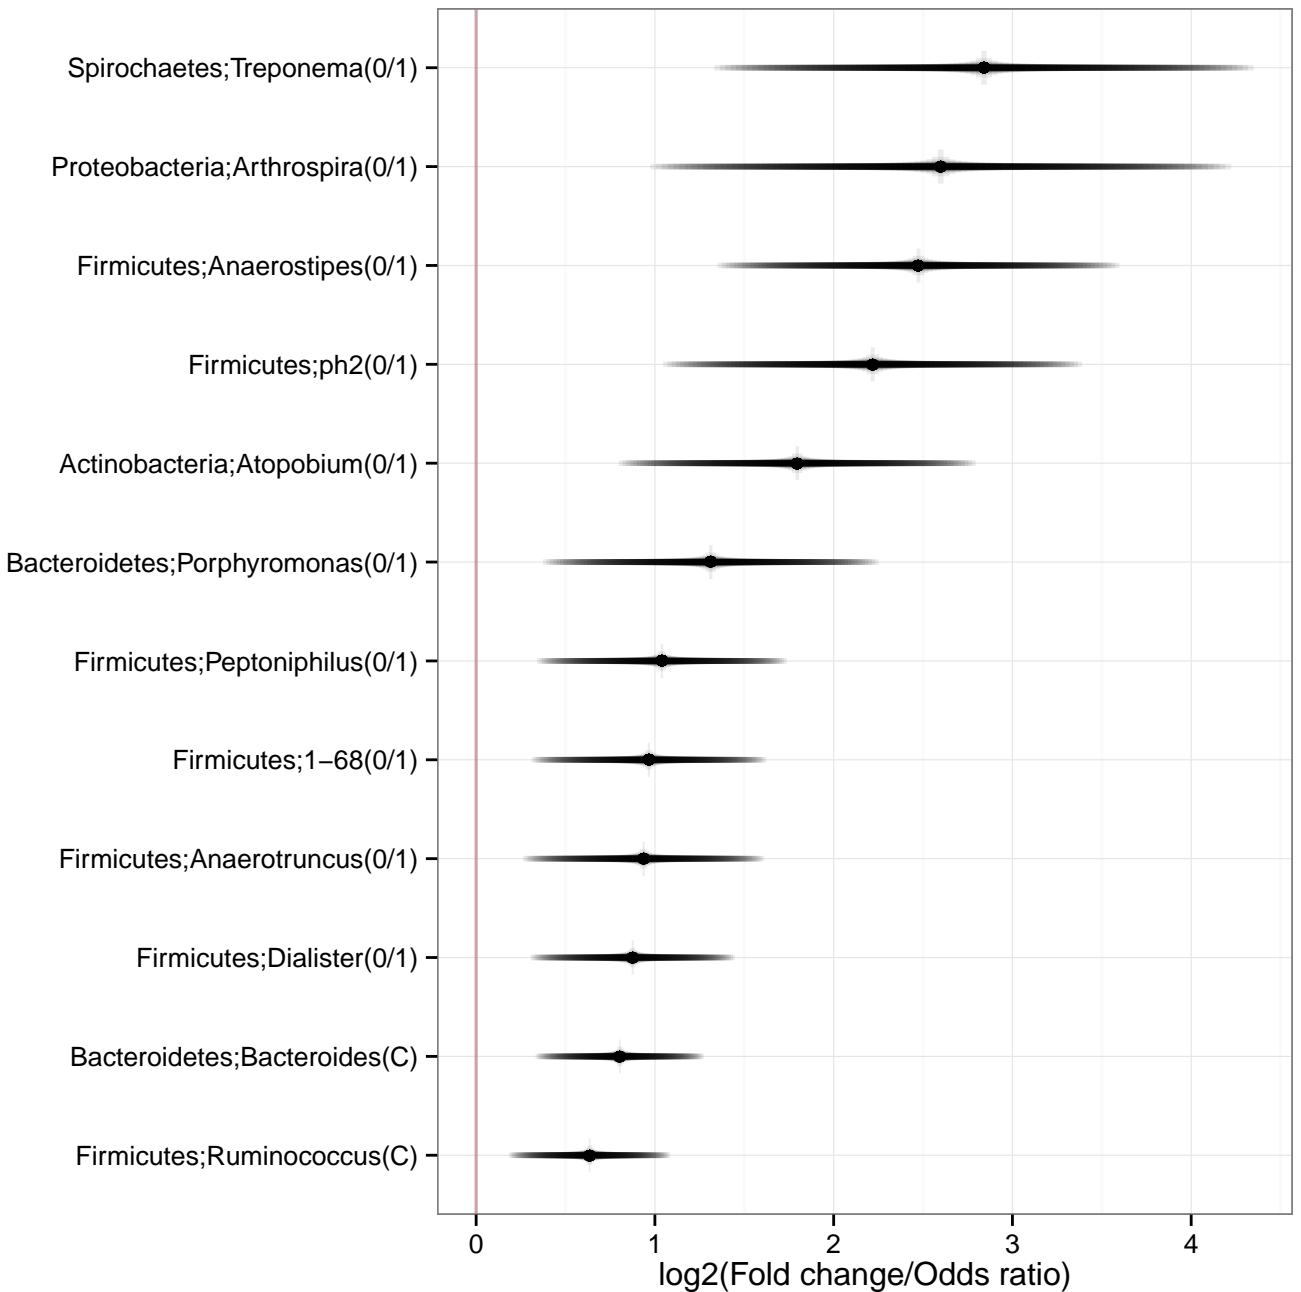

Supplement: 13073_2016_368_MOESM7_ESM.pdf [file 13073_2016_368_MOESM7_ESM.pdf]
